# Supplementary material for: Differential Functions of Pepper Stress-Associated Proteins in Response to Abiotic Stresses
Source: PubMed Central journal article supplement (PMC8702622; doi:10.3389/fpls.2021.756068), 2021-12-10
Supplement: Table_1.pdf [file Table_1.pdf]

Supplementary Table 1. List of primers used in this study.

| Name               |                          | sequence (5'-3')                  |
|--------------------|--------------------------|-----------------------------------|
| <b>For cloning</b> |                          |                                   |
| CA02g10410 CDS     | Forward                  | ATGACTTCTTGTAACAAAGTATTAGTAACT    |
|                    | Reverse (w/o stop codon) | GATCCTATTCTCAAGTTTGTACAGCTT       |
| CA03g17080 CDS     | Forward                  | ATGACTTCAGTAATAACCCCAATTAGTA      |
|                    | Reverse (w/o stop codon) | GATCCTATTCTCAAGTTTATCACCTTT       |
| CA00g44110 CDS     | Forward                  | ATGAGTTCTTGTTACAAAGCAGAAAAA       |
|                    | Reverse (w/o stop codon) | GATCCTAGTCTCAAGTTTATCAACTTTG      |
| CA01g16220 CDS     | Forward                  | ATGGAGGCATGGTGTGTTGACAATA         |
|                    | Reverse (w/o stop codon) | GATCTTGTCAAGTTTTCTGCTTTAAC        |
| CA01g19950 CDS     | Forward                  | ATGGAGCAAATGATACAGGCTG            |
|                    | Reverse (w/o stop codon) | TATTTTGTCAAGCTTTTCAGCCTTA         |
| CA10g20690 CDS     | Forward                  | ATGGAGTCTTCCAAAGAGACAGGC          |
|                    | Reverse (w/o stop codon) | GATCTTGTTAGCTTTTCCGCTAC           |
| <b>For VIGS</b>    |                          |                                   |
| CA02g10410 VIGS    | Forward                  | TCTAGAATGACTTCTTGTAACAAAGTATTA    |
|                    | Reverse                  | CTCGAGATATCTATGACTTATGCAAAA       |
| CA03g17080 VIGS    | Forward                  | TCTAGAATGACTTCAGTAATAACCCCA       |
|                    | Reverse                  | CTCGAGAGCACATGCATGTTCTTC          |
| CA00g44110 VIGS    | Forward                  | TCTAGAATGAGTTCTTGTTACAAAGCAG      |
|                    | Reverse                  | CTCGAGCATTCTCCTCCACATC            |
| CA01g16220 VIGS    | Forward                  | TCTAGATGTGTTGACAATATGGAGCAT       |
|                    | Reverse                  | CTCGAGGCTTGAAGTTTGAGATGATGGCAAAG  |
| CA01g19950 VIGS    | Forward                  | TCTAGAATGGAGCAAAATGATACAGGCTGCCAA |
|                    | Reverse                  | CTCGAGTTCTTCGCTCTCGGGTGACATGCCAA  |
| CA10g20690 VIGS    | Forward                  | TCTAGAATGGAGTCTTCCAAAGAGACA       |
|                    | Reverse                  | CTCGAGTTGACCTGAGGATAAAGC          |
| <b>For RT-PCR</b>  |                          |                                   |
| CA01g04040 RT      | Forward                  | GGACTTTGTTCCAAGTGTTACAGAG         |
|                    | Reverse                  | ACATCTGCCTTAAATCCCCTACT           |
| CA02g10410 RT      | Forward                  | CTCCAATTTTCATGCGAGAGTAGTTG        |
|                    | Reverse                  | ACAAATGAACCTTGTTAATCCCACC         |
| CA03g17080 RT      | Forward                  | CCCAATTAGTAGTTGTGGCTTTTGT         |
|                    | Reverse                  | TATTAATCCCACCTTCTTCTGCAA          |
| CA00g44110 RT      | Forward                  | TTATGTTCAAGGGGTTGTGGTTTTT         |
|                    | Reverse                  | CATCGACAGCTAAACCTGTAAATC          |
| CA10g16510 RT      | Forward                  | CGATACTATCTTTCTCCTCCACAG          |
|                    | Reverse                  | TGAAATCAAACGAACATCCGTGAAT         |
| CA12g06430 RT      | Forward                  | CATTTTGTGGTTCACATAGGTACCC         |
|                    | Reverse                  | ATCATCCATGATCATCACCAAACG          |
| CA01g16220 RT      | Forward                  | CATGTGCTCCAAGTGTTACAAAGAT         |
|                    | Reverse                  | TAGGACCCACTTTAGCCTTTACTTC         |
| CA01g19950 RT      | Forward                  | GAGCAAAGAAGTTGAGAAGGCTAAG         |
|                    | Reverse                  | CAGCTCATAACTCGAACATTCCATC         |
| CA10g20690 RT      | Forward                  | TGTAAATGGAACTCAAGCAGCAAT          |
|                    | Reverse                  | ATCCCGACCAGCATTCTATAATCA          |
| CA01g19980 RT      | Forward                  | CTGGAAAGGATGAGTCAAGATCTGA         |
|                    | Reverse                  | GCGATTTTCGTGTTTTCTTTTCAA          |
| CA12g22410 RT      | Forward                  | GCACCGTAACAAATAACGATCTGAT         |
|                    | Reverse                  | TGGGAGCTTTAACAACCTGGATTTTC        |
| CA02g29220 RT      | Forward                  | CACTGCCAACTATCTGATTGTCATC         |
|                    | Reverse                  | CCAGATTTCTCGTGTCTGCAATA           |
| CA05g01100 RT      | Forward                  | AGTGAGTTTAAACCAAACACAGCAA         |
|                    | Reverse                  | TGTTCTTTTCAACATGTTCCACAA          |
| CA10g19590 RT      | Forward                  | ATGGGTACACCAGAATTCCAAAT           |
|                    | Reverse                  | TTTCGTAGTTTGTGATGCACACTCG         |
| CaACT1 RT          | Forward                  | GACGTGACCTAACTGATAACCTGAT         |
| (CA12g08730)       | Reverse                  | CTCTCAGCACCAATGGTAATAACTT         |
| CaOSR1 RT          | Forward                  | ATGGAGGCACAACCTGCACCGTC           |
| (CA03g17780)       | Reverse                  | GGCCACCATGAACCTTCTGCAC            |
| CaRAB18 RT         | Forward                  | ATGTCGCACTACGAGAACCAATATAG        |
| (CA02g22060)       | Reverse                  | ATCATCCTCAGAGCTGCTGGAGC           |
| CaNCED3 RT         | Forward                  | TTAAGGATCTTAAGCGTGGTTATGT         |
| (CA08g03620)       | Reverse                  | AGATTAGTTCAAGAACGTGAATTGG         |
| CaDREB1 RT         | Forward                  | GGAAATTTCAAAGAAATCATCTAGCA        |
| (CA03g16520)       | Reverse                  | AGCTAGAAGAGTACTGCATCCAAA          |
